# Supplementary material for: The burden of polycystic ovary syndrome-related infertility in 204 countries and territories, 1990-2021: an analysis of the global burden of disease study 2021
Source: Frontiers journal article supplement (doi:10.3389/fendo.2025.1559246), 2025-06-06
Supplement: Table_2.xls [file Table_2.xls]

## Sheet: TableS2
Table S2: YLDs due to POCS-related infertility in 1990 and 2021 and the percentagechange in the age-standardised rates per 100,000, by global,regions and countries.
location_name	1990_No_(95%_UI)	1990_ASRs_per_100000_(95%_UI)	2021_No_(95%_UI)	2021_ASRs_per_100000_(95%_UI)	Percentage_change_in_the_ASRs_per_100000
Global	37030 (14713,82469)	1.4 (0.5,3)	71555 (27969,161718)	1.8 (0.7,4.1)	32.5 (26.6,39.4)
Andean Latin America	308 (118,707)	1.6 (0.6,3.8)	977 (379,2231)	2.7 (1.1,6.2)	65.2 (27.5,108.7)
Bolivia (Plurinational State of)	52 (20,120)	1.7 (0.7,4)	158 (63,367)	2.5 (1,5.7)	41.5 (6.9,80.7)
Ecuador	114 (44,260)	2.2 (0.9,5.1)	281 (105,648)	2.9 (1.1,6.7)	30.2 (-6.6,67.5)
Peru	142 (53,312)	1.3 (0.5,2.9)	537 (207,1236)	2.7 (1,6.2)	102 (50.5,164.4)
Australasia	307 (110,661)	2.8 (1,6)	475 (175,1021)	3.2 (1.2,6.8)	14.6 (0.4,30.6)
Australia	242 (87,517)	2.6 (0.9,5.6)	370 (135,802)	3 (1.1,6.4)	13 (-5.1,32.5)
New Zealand	65 (24,149)	3.5 (1.3,8)	105 (40,227)	4.3 (1.6,9.1)	21.4 (3.3,48.3)
Caribbean	252 (98,585)	1.3 (0.5,3)	384 (148,876)	1.6 (0.6,3.6)	21 (12.4,30.3)
Antigua and Barbuda	0 (0,1)	1.3 (0.5,3)	1 (0,2)	1.7 (0.7,4)	31.4 (9.6,55)
Bahamas	2 (1,6)	1.6 (0.6,4)	4 (2,10)	1.9 (0.7,4.6)	17.7 (2.8,36.7)
Barbados	2 (1,6)	1.6 (0.6,3.9)	3 (1,7)	1.9 (0.7,4.6)	17.3 (0.4,38.3)
Belize	1 (0,3)	1.3 (0.5,2.9)	4 (2,11)	1.8 (0.7,4.4)	39.1 (13.3,67.7)
Bermuda	1 (0,2)	2 (0.7,4.5)	1 (0,1)	2.2 (0.8,5.1)	10.4 (-5.8,28.9)
Cuba	90 (36,209)	1.4 (0.6,3.3)	89 (34,205)	1.9 (0.7,4.3)	30.5 (10.3,51.9)
Dominica	0 (0,1)	1.3 (0.5,2.8)	1 (0,1)	1.8 (0.6,4.1)	35.2 (14.7,59.7)
Dominican Republic	44 (17,102)	1.1 (0.4,2.6)	102 (39,235)	1.7 (0.7,4)	52.4 (26.6,84.2)
Grenada	0 (0,1)	1.1 (0.4,2.6)	1 (0,2)	1.6 (0.6,3.8)	41.1 (19.1,70.5)
Guyana	5 (2,12)	1.2 (0.4,2.8)	7 (3,16)	1.7 (0.7,3.9)	43.7 (18.8,70.8)
Haiti	29 (11,67)	0.9 (0.3,2.1)	75 (28,168)	1 (0.4,2.3)	14.9 (-4.5,39.8)
Jamaica	16 (6,37)	1.3 (0.5,3)	27 (10,62)	1.7 (0.6,4)	33.1 (14,56.7)
Puerto Rico	37 (14,89)	1.9 (0.7,4.6)	36 (13,85)	2.4 (0.9,5.8)	25.4 (11,43.7)
Saint Kitts and Nevis	0 (0,1)	1.5 (0.6,3.4)	1 (0,1)	2 (0.8,4.6)	33 (12.1,55.7)
Saint Lucia	1 (0,2)	1.3 (0.5,2.9)	1 (1,3)	1.7 (0.6,3.9)	32.1 (12,54.7)
Saint Vincent and the Grenadines	1 (0,1)	1.1 (0.4,2.6)	1 (0,2)	1.7 (0.7,4)	47.2 (25,75.9)
Suriname	3 (1,6)	1.3 (0.5,3.1)	5 (2,12)	1.7 (0.7,4.1)	33.4 (13.3,61.4)
Trinidad and Tobago	9 (3,20)	1.3 (0.5,3.1)	13 (5,30)	1.9 (0.7,4.4)	41.7 (17.6,71.5)
United States Virgin Islands	1 (0,2)	1.9 (0.7,4.4)	1 (0,2)	2.3 (0.9,5.4)	23.8 (7.4,43.4)
Central Asia	134 (50,311)	0.4 (0.1,0.9)	256 (95,612)	0.5 (0.2,1.2)	37 (21.4,52.8)
Armenia	6 (2,15)	0.3 (0.1,0.8)	7 (2,16)	0.5 (0.2,1.1)	33.3 (2.1,72.3)
Azerbaijan	14 (5,32)	0.4 (0.1,0.8)	31 (11,73)	0.6 (0.2,1.3)	55.2 (20.9,92.6)
Georgia	13 (5,30)	0.4 (0.2,1.1)	12 (4,28)	0.8 (0.3,1.8)	70.9 (32.3,119.4)
Kazakhstan	35 (13,83)	0.4 (0.1,1)	53 (20,124)	0.6 (0.2,1.3)	37.8 (8.7,77)
Kyrgyzstan	8 (3,19)	0.4 (0.1,0.9)	16 (6,35)	0.4 (0.2,1)	19.5 (-6.4,51.9)
Mongolia	4 (1,9)	0.3 (0.1,0.8)	9 (3,20)	0.5 (0.2,1.2)	43.5 (11.6,87.3)
Tajikistan	8 (3,18)	0.3 (0.1,0.7)	20 (7,49)	0.4 (0.1,0.9)	27.2 (-2.7,68.8)
Turkmenistan	7 (3,17)	0.4 (0.1,0.9)	14 (5,33)	0.5 (0.2,1.3)	44.3 (16.7,80.6)
Uzbekistan	39 (14,91)	0.4 (0.1,0.9)	95 (33,223)	0.5 (0.2,1.2)	39.7 (11.8,77.3)
Central Europe	124 (45,292)	0.2 (0.1,0.5)	121 (45,287)	0.2 (0.1,0.6)	21.5 (6.5,39.5)
Albania	3 (1,6)	0.2 (0.1,0.4)	2 (1,6)	0.2 (0.1,0.5)	24.5 (-9,77.5)
Bosnia and Herzegovina	3 (1,8)	0.1 (0,0.3)	3 (1,7)	0.2 (0.1,0.5)	56.8 (16.8,120.5)
Bulgaria	7 (3,19)	0.2 (0.1,0.4)	6 (2,15)	0.2 (0.1,0.5)	28.3 (-3.1,76)
Croatia	4 (1,10)	0.2 (0.1,0.4)	4 (1,10)	0.2 (0.1,0.6)	35 (-2.5,94.2)
Czechia	9 (3,22)	0.2 (0.1,0.4)	9 (3,23)	0.2 (0.1,0.5)	28.1 (-5,77.5)
Hungary	9 (3,22)	0.2 (0.1,0.4)	9 (3,21)	0.2 (0.1,0.5)	22.8 (-10.2,72.1)
Montenegro	1 (0,1)	0.2 (0.1,0.4)	1 (0,2)	0.2 (0.1,0.5)	27.9 (-3,69.4)
North Macedonia	2 (1,4)	0.1 (0.1,0.3)	2 (1,5)	0.2 (0.1,0.5)	38.1 (0.7,98.2)
Poland	55 (20,125)	0.3 (0.1,0.6)	50 (19,119)	0.3 (0.1,0.7)	3.3 (-14.7,27.1)
Romania	18 (6,43)	0.2 (0.1,0.4)	17 (6,41)	0.2 (0.1,0.5)	39.6 (2.2,101.3)
Serbia	7 (3,18)	0.2 (0.1,0.4)	8 (3,20)	0.2 (0.1,0.5)	35 (-0.8,93.5)
Slovakia	4 (1,10)	0.2 (0.1,0.4)	5 (2,13)	0.2 (0.1,0.5)	38.8 (3.2,89)
Slovenia	2 (1,4)	0.2 (0.1,0.4)	2 (1,4)	0.2 (0.1,0.5)	41.6 (3.5,99.1)
Central Latin America	2030 (816,4728)	2.4 (1,5.6)	3873 (1510,8835)	2.8 (1.1,6.4)	16.3 (6.9,31.4)
Colombia	285 (112,644)	1.6 (0.6,3.6)	551 (226,1250)	2 (0.8,4.6)	27.2 (4.5,51)
Costa Rica	34 (13,79)	2.1 (0.8,4.9)	72 (27,169)	2.7 (1,6.3)	29 (10.4,51)
El Salvador	43 (16,98)	1.7 (0.6,3.7)	80 (31,183)	2.2 (0.8,5)	32.4 (5.8,61.6)
Guatemala	51 (19,120)	1.4 (0.5,3.2)	178 (69,405)	2 (0.8,4.5)	42.1 (18.7,72.7)
Honduras	30 (11,69)	1.4 (0.5,3.2)	118 (44,276)	2 (0.7,4.7)	46 (24.7,74.7)
Mexico	1339 (540,3137)	3.1 (1.2,7.2)	2410 (933,5541)	3.4 (1.3,7.9)	10.3 (-1.8,32.2)
Nicaragua	28 (11,65)	1.5 (0.6,3.5)	79 (31,187)	2.1 (0.8,5)	39 (18.7,62.7)
Panama	19 (7,44)	1.5 (0.6,3.4)	49 (19,115)	2.3 (0.9,5.3)	54.6 (31.4,86.4)
Venezuela (Bolivarian Republic of)	201 (77,470)	2 (0.8,4.7)	335 (128,759)	2.5 (0.9,5.6)	23.5 (4.3,46)
Central Sub-Saharan Africa	127 (47,290)	0.5 (0.2,1.1)	505 (190,1156)	0.8 (0.3,1.7)	51.2 (30.3,77.3)
Angola	22 (8,49)	0.5 (0.2,1)	131 (48,296)	0.8 (0.3,1.9)	81.3 (42.5,126.3)
Central African Republic	8 (3,20)	0.6 (0.2,1.5)	19 (7,45)	0.7 (0.3,1.6)	10.8 (-9.5,34.7)
Congo	7 (3,16)	0.6 (0.2,1.4)	25 (10,56)	0.9 (0.3,1.9)	39.8 (16.4,69)
Democratic Republic of the Congo	85 (31,200)	0.5 (0.2,1.1)	309 (116,715)	0.7 (0.3,1.6)	45.2 (19.5,80.9)
Equatorial Guinea	1 (0,2)	0.5 (0.2,1.2)	9 (3,21)	1.2 (0.5,2.8)	132.3 (90.9,196.1)
Gabon	3 (1,8)	0.7 (0.3,1.7)	11 (4,26)	1.1 (0.4,2.6)	49.4 (23.1,81.5)
East Asia	6153 (2345,14287)	0.9 (0.3,2.1)	10765 (3980,25376)	1.6 (0.6,3.8)	80.4 (66.9,97.3)
China	5867 (2240,13606)	0.9 (0.3,2.1)	10349 (3825,24418)	1.6 (0.6,3.8)	82.6 (68.3,100.2)
Democratic People's Republic of Korea	106 (38,254)	0.9 (0.3,2.2)	136 (50,312)	1 (0.4,2.3)	11.6 (-5.1,36.7)
Taiwan (Province of China)	179 (65,421)	1.6 (0.6,3.7)	280 (105,641)	2.4 (0.9,5.6)	55.9 (31.4,87.4)
Eastern Europe	268 (99,605)	0.2 (0.1,0.5)	289 (105,659)	0.3 (0.1,0.7)	28.7 (18.9,40.5)
Belarus	12 (4,29)	0.2 (0.1,0.6)	13 (5,31)	0.3 (0.1,0.8)	33.6 (0.8,82.1)
Estonia	2 (1,4)	0.2 (0.1,0.6)	2 (1,4)	0.3 (0.1,0.8)	40.1 (9.4,88.9)
Latvia	3 (1,7)	0.2 (0.1,0.6)	2 (1,5)	0.3 (0.1,0.7)	30 (-4.7,74.4)
Lithuania	4 (1,9)	0.2 (0.1,0.5)	3 (1,8)	0.3 (0.1,0.7)	38 (3.1,83)
Republic of Moldova	4 (1,10)	0.2 (0.1,0.4)	5 (2,12)	0.3 (0.1,0.7)	48.3 (11.3,98.3)
Russian Federation	183 (68,417)	0.2 (0.1,0.5)	209 (75,479)	0.3 (0.1,0.7)	30.2 (20.5,40.5)
Ukraine	59 (21,132)	0.2 (0.1,0.5)	55 (20,127)	0.3 (0.1,0.6)	19.2 (-6.2,50.1)
Eastern Sub-Saharan Africa	511 (198,1145)	0.6 (0.2,1.3)	1606 (603,3639)	0.7 (0.3,1.6)	27.2 (19,36.1)
Burundi	13 (5,29)	0.5 (0.2,1.1)	30 (11,70)	0.5 (0.2,1.1)	-2 (-19.7,18)
Comoros	2 (1,4)	0.8 (0.3,1.7)	4 (1,8)	0.9 (0.3,2)	19.1 (-2,45.1)
Djibouti	1 (0,3)	0.6 (0.2,1.3)	6 (2,15)	1 (0.4,2.3)	70.4 (39.5,119.8)
Eritrea	7 (3,16)	0.4 (0.2,1)	22 (8,52)	0.7 (0.2,1.5)	50.2 (19.9,86.2)
Ethiopia	101 (38,225)	0.4 (0.2,1)	379 (146,867)	0.7 (0.3,1.5)	53 (33.7,74.5)
Kenya	69 (27,158)	0.7 (0.2,1.5)	223 (83,503)	0.8 (0.3,1.8)	24.7 (16.1,33.6)
Madagascar	31 (11,71)	0.5 (0.2,1.3)	95 (37,213)	0.6 (0.2,1.4)	16.5 (-4.4,51.2)
Malawi	34 (12,75)	0.7 (0.3,1.6)	72 (27,165)	0.7 (0.3,1.6)	-2.4 (-19.3,21.1)
Mozambique	34 (13,80)	0.5 (0.2,1.2)	125 (46,279)	0.8 (0.3,1.8)	52.8 (25,87)
Rwanda	20 (7,47)	0.6 (0.2,1.4)	54 (20,123)	0.7 (0.3,1.7)	27.2 (1.5,58.7)
Somalia	18 (7,42)	0.5 (0.2,1.2)	62 (22,142)	0.6 (0.2,1.4)	17.8 (-3,42.9)
South Sudan	16 (6,37)	0.6 (0.2,1.4)	31 (11,76)	0.7 (0.2,1.6)	12.3 (-7.4,34.8)
Uganda	49 (17,108)	0.6 (0.2,1.3)	152 (57,361)	0.7 (0.3,1.7)	16.4 (-6.4,42.4)
United Republic of Tanzania	87 (32,195)	0.7 (0.3,1.6)	250 (90,595)	0.8 (0.3,1.9)	16.6 (-3.6,41.1)
Zambia	30 (11,69)	0.8 (0.3,1.8)	98 (35,224)	1 (0.3,2.2)	21.4 (-1.8,47.5)
High-income Asia Pacific	3434 (1331,7287)	3.7 (1.4,7.9)	3087 (1198,6455)	3.9 (1.5,8.2)	5.7 (-1.9,12.9)
Brunei Darussalam	3 (1,6)	1.9 (0.7,4.1)	7 (3,15)	2.7 (1,5.7)	40 (20.1,63.9)
Japan	2972 (1151,6265)	4.6 (1.8,9.8)	2419 (938,5096)	4.7 (1.8,10.2)	3.9 (-3,11.2)
Republic of Korea	424 (154,915)	1.7 (0.6,3.6)	572 (218,1200)	2.3 (0.9,5.1)	41.2 (22.2,65.3)
Singapore	36 (13,78)	1.8 (0.7,3.9)	90 (35,195)	2.7 (1,5.8)	47.7 (27.3,71.8)
High-income North America	4471 (1770,9785)	2.8 (1.1,6.3)	6315 (2468,13943)	3.7 (1.5,8.2)	30.7 (14.4,54.5)
Canada	227 (90,512)	1.5 (0.6,3.3)	309 (119,702)	1.8 (0.7,4.2)	25.5 (8.7,44.3)
Greenland	0 (0,1)	1.3 (0.5,2.8)	0 (0,1)	1.6 (0.7,3.6)	29.7 (11.3,50.5)
United States of America	4243 (1670,9343)	3 (1.2,6.6)	6006 (2341,13245)	3.9 (1.5,8.6)	30.9 (13.9,56.1)
North Africa and Middle East	3039 (1186,6759)	1.9 (0.7,4.2)	7844 (3024,17832)	2.4 (0.9,5.5)	29.1 (18,39.4)
Afghanistan	44 (16,102)	1 (0.4,2.3)	205 (80,468)	1.4 (0.5,3.2)	40.2 (17.8,70.8)
Algeria	213 (78,481)	1.8 (0.6,4)	574 (216,1364)	2.5 (1,6)	43.9 (22.5,68.2)
Bahrain	6 (2,14)	2.4 (0.9,5.5)	18 (7,40)	2.8 (1,6.1)	13.4 (-1.3,30.2)
Egypt	623 (243,1318)	2.3 (0.9,4.9)	1454 (569,3236)	2.7 (1.1,6.1)	18.3 (-3.3,39.9)
Iran (Islamic Republic of)	549 (215,1226)	2.1 (0.8,4.7)	1279 (496,2854)	2.7 (1.1,6.1)	31 (22.9,39.6)
Iraq	173 (69,409)	2.1 (0.8,4.8)	506 (195,1130)	2.4 (0.9,5.3)	14.6 (-1.8,33.8)
Jordan	34 (14,77)	1.9 (0.8,4.4)	150 (56,348)	2.4 (0.9,5.5)	22.5 (2.8,44.5)
Kuwait	23 (8,51)	2.6 (1,5.9)	91 (35,212)	3.1 (1.2,7.1)	19.4 (2.6,40.5)
Lebanon	32 (12,72)	2.1 (0.8,4.7)	81 (30,184)	2.7 (1,6.1)	30.6 (13.6,60.3)
Libya	43 (16,99)	2.3 (0.9,5.2)	103 (39,237)	2.6 (1,6)	12.7 (-3.1,30.8)
Morocco	232 (93,518)	1.8 (0.7,4)	472 (180,1100)	2.4 (0.9,5.6)	35.3 (13.1,59.3)
Oman	12 (5,28)	1.7 (0.6,4)	58 (22,129)	2.8 (1,6.2)	62.5 (38.6,96.3)
Palestine	16 (6,37)	1.8 (0.7,4.2)	61 (23,136)	2.3 (0.9,5.1)	26.2 (7.7,46)
Qatar	4 (2,10)	2.6 (1,5.9)	35 (13,77)	3 (1.1,7)	17.5 (1.8,36.8)
Saudi Arabia	145 (55,335)	2.1 (0.8,4.8)	614 (234,1382)	3 (1.1,6.8)	38.7 (17,61.3)
Sudan	115 (43,276)	1.2 (0.4,2.8)	482 (182,1097)	2.1 (0.8,4.7)	74.6 (44.7,109.8)
Syrian Arab Republic	99 (38,229)	1.7 (0.7,4)	177 (68,396)	2.3 (0.9,5.3)	34.4 (11.8,60.4)
Tunisia	77 (29,188)	1.8 (0.7,4.3)	150 (58,345)	2.5 (1,5.6)	34.4 (11.2,59)
Turkey	510 (191,1160)	1.7 (0.6,3.9)	965 (364,2221)	2.2 (0.8,5.1)	NA
United Arab Emirates	16 (6,36)	2.1 (0.8,4.9)	94 (35,214)	2.8 (1.1,6.3)	30.1 (9.5,49.2)
Yemen	71 (27,165)	1.3 (0.5,2.9)	267 (100,618)	1.6 (0.6,3.6)	23.8 (1.4,43)
Oceania	43 (17,98)	1.3 (0.5,3)	126 (48,283)	1.8 (0.7,4)	33.4 (16.9,51.4)
American Samoa	1 (0,1)	2.1 (0.8,5)	1 (0,1)	2.8 (1.1,6.5)	35.3 (18.3,55.6)
Cook Islands	0 (0,0)	2.2 (0.8,5)	0 (0,1)	3.1 (1.2,7)	43.6 (23,65.4)
Fiji	7 (3,17)	1.8 (0.7,4.1)	12 (5,28)	2.7 (1,6.1)	49 (30.7,75.3)
Guam	2 (1,4)	2.3 (0.9,5.3)	2 (1,5)	3.2 (1.2,7.3)	36.9 (22,63.4)
Kiribati	1 (0,1)	1.5 (0.5,3.5)	1 (1,3)	2.1 (0.8,4.6)	43.5 (21.8,71.7)
Marshall Islands	0 (0,1)	1.3 (0.5,2.9)	1 (0,1)	2.1 (0.8,4.7)	63.2 (38.9,90.3)
Micronesia (Federated States of)	1 (0,2)	1.6 (0.6,3.7)	1 (0,3)	2.3 (0.8,5.3)	41.4 (21.1,66)
Nauru	0 (0,0)	1.8 (0.7,4.2)	0 (0,0)	2.6 (1,5.9)	41.7 (20.2,66.1)
Niue	0 (0,0)	2 (0.8,4.6)	0 (0,0)	2.9 (1.1,6.7)	47.2 (26.6,71.8)
Northern Mariana Islands	1 (0,2)	2.2 (0.8,5.1)	1 (0,1)	2.8 (1,6.4)	27 (10.3,44.6)
Palau	0 (0,0)	2.1 (0.8,4.8)	0 (0,0)	2.9 (1.1,6.7)	40.5 (23,61.5)
Papua New Guinea	22 (9,51)	1.1 (0.4,2.5)	87 (33,196)	1.6 (0.6,3.6)	43.4 (16.4,73.1)
Samoa	1 (1,3)	1.9 (0.7,4.4)	2 (1,6)	2.5 (0.9,5.7)	32 (14.3,53.7)
Solomon Islands	2 (1,5)	1.2 (0.5,2.9)	7 (3,15)	1.9 (0.7,4.3)	54.2 (27,82.3)
Tokelau	0 (0,0)	1.7 (0.6,4)	0 (0,0)	2.7 (1,6.2)	58.7 (35.5,83.3)
Tonga	1 (0,2)	2.1 (0.8,4.8)	1 (1,3)	2.8 (1.1,6.5)	33.7 (12.6,54.4)
Tuvalu	0 (0,0)	1.6 (0.6,3.6)	0 (0,0)	2.4 (0.9,5.6)	53.3 (31.6,77.8)
Vanuatu	1 (0,2)	1.4 (0.6,3.3)	3 (1,8)	2.1 (0.8,4.7)	45.5 (25.3,69.5)
South Asia	3756 (1448,8376)	0.7 (0.3,1.6)	12709 (4770,29126)	1.3 (0.5,2.9)	75.9 (62.9,91.6)
Bangladesh	221 (82,474)	0.4 (0.2,0.9)	635 (239,1428)	0.7 (0.3,1.5)	57.7 (26.8,103.7)
Bhutan	2 (1,4)	0.6 (0.2,1.3)	5 (2,10)	1.1 (0.4,2.4)	76.6 (42.8,123.9)
India	3123 (1211,7003)	0.8 (0.3,1.7)	10828 (4060,24878)	1.4 (0.5,3.2)	86.7 (71.5,104.3)
Nepal	41 (15,95)	0.4 (0.2,1)	132 (50,302)	0.7 (0.3,1.6)	57.2 (22.9,96.5)
Pakistan	368 (138,879)	0.8 (0.3,1.8)	1110 (418,2603)	0.9 (0.3,2.1)	16.8 (2.7,34)
Southeast Asia	4144 (1599,9342)	1.7 (0.6,3.8)	11001 (4214,24631)	3 (1.1,6.7)	75.1 (62.4,90.6)
Cambodia	63 (23,145)	1.2 (0.4,2.8)	191 (69,442)	2.1 (0.8,4.7)	67.2 (45.2,97)
Indonesia	1703 (668,3843)	1.7 (0.7,4)	4781 (1859,10720)	3.1 (1.2,7.1)	80 (62.9,100.7)
Lao People's Democratic Republic	28 (11,62)	1.4 (0.5,3.2)	103 (39,235)	2.5 (0.9,5.8)	78.6 (52.7,109.7)
Malaysia	221 (81,498)	2.4 (0.9,5.4)	693 (265,1606)	4 (1.5,9.2)	64.1 (39.9,90.7)
Maldives	2 (1,4)	1.7 (0.6,3.7)	8 (3,19)	3.4 (1.3,7.9)	104.1 (73.3,146.4)
Mauritius	15 (6,34)	2.4 (0.9,5.4)	24 (9,56)	3.8 (1.4,8.7)	53.7 (30.8,80.1)
Myanmar	281 (104,658)	1.3 (0.5,3.1)	764 (293,1690)	2.5 (1,5.6)	91.4 (58.5,131.1)
Philippines	537 (200,1226)	1.7 (0.6,4)	1723 (643,3908)	2.9 (1.1,6.6)	68.4 (56.4,80.8)
Seychelles	1 (0,2)	2.6 (0.9,5.9)	2 (1,4)	3.5 (1.3,8)	36.2 (16.6,56.9)
Sri Lanka	199 (75,451)	2.1 (0.8,4.8)	360 (137,819)	3.2 (1.2,7.2)	50.4 (25.7,77.8)
Thailand	674 (254,1520)	2 (0.8,4.6)	1165 (437,2672)	3.6 (1.4,8.3)	76.3 (46.2,112.1)
Timor-Leste	5 (2,12)	1.4 (0.5,3.1)	15 (6,34)	2.2 (0.8,4.9)	60.1 (36.5,86.7)
Viet Nam	409 (152,906)	1.2 (0.4,2.6)	1157 (435,2607)	2.2 (0.8,5)	88.5 (57.6,125.3)
Southern Latin America	310 (114,702)	1.2 (0.5,2.8)	690 (261,1562)	1.9 (0.7,4.4)	55.8 (37.3,73.3)
Uruguay	19 (7,43)	1.2 (0.5,2.9)	34 (12,75)	2 (0.7,4.4)	60.7 (39.2,87.9)
Argentina	195 (71,446)	1.2 (0.4,2.8)	446 (169,1006)	1.8 (0.7,4.1)	51.3 (29.2,75.6)
Chile	96 (36,216)	1.3 (0.5,2.9)	210 (76,476)	2.2 (0.8,4.9)	66.5 (41.8,96.1)
Southern Sub-Saharan Africa	261 (101,601)	0.9 (0.4,2.2)	509 (197,1171)	1.1 (0.4,2.6)	20.4 (9.6,32.5)
Botswana	4 (2,11)	0.7 (0.2,1.6)	16 (6,36)	1.1 (0.4,2.6)	62.1 (33,97.4)
Eswatini	4 (1,9)	1 (0.4,2.3)	8 (3,18)	1.2 (0.4,2.7)	22.1 (2.9,43.8)
Lesotho	5 (2,13)	0.7 (0.3,1.6)	11 (4,25)	1 (0.4,2.4)	48 (24.8,75.6)
Namibia	5 (2,11)	0.7 (0.3,1.6)	13 (5,30)	0.9 (0.4,2.2)	34.3 (8.6,64.6)
South Africa	203 (79,470)	1 (0.4,2.3)	390 (149,917)	1.2 (0.5,2.9)	20.9 (8.9,36.5)
Zimbabwe	39 (14,90)	0.8 (0.3,1.8)	72 (28,166)	0.9 (0.3,2)	8.2 (-13,32.3)
Tropical Latin America	504 (190,1133)	0.6 (0.2,1.4)	792 (295,1818)	0.6 (0.2,1.5)	4.3 (-3.2,11.4)
Brazil	495 (187,1116)	0.6 (0.2,1.4)	765 (285,1757)	0.6 (0.2,1.5)	3.3 (-4.2,10.7)
Paraguay	9 (3,20)	0.4 (0.2,1)	27 (10,63)	0.7 (0.3,1.6)	55.5 (22.1,95.2)
Western Europe	6359 (2638,14269)	3.2 (1.3,7.2)	7277 (2911,16359)	3.8 (1.5,8.6)	19.4 (10.7,28.2)
Andorra	1 (0,2)	3 (1.2,6.8)	1 (1,3)	3.6 (1.4,8.4)	20.2 (4.1,39.8)
Austria	166 (68,380)	4 (1.6,9.3)	174 (68,398)	4.2 (1.6,9.7)	5.3 (-7.7,22.4)
Belgium	166 (64,377)	3.3 (1.2,7.4)	197 (76,443)	3.9 (1.5,8.7)	18.9 (0.9,41.5)
Cyprus	10 (4,23)	2.5 (1,5.7)	26 (10,59)	3.4 (1.4,7.8)	38.2 (18.9,62.3)
Denmark	58 (24,122)	2.1 (0.9,4.4)	77 (31,168)	3 (1.2,6.6)	40.8 (10.6,74.4)
Finland	68 (27,153)	2.5 (1,5.7)	78 (30,172)	3.3 (1.3,7.3)	33.5 (9.9,59.3)
France	869 (331,1893)	2.9 (1.1,6.3)	1040 (417,2415)	3.6 (1.5,8.4)	24.7 (5.8,46.4)
Germany	952 (392,2136)	2.3 (0.9,5.2)	1050 (423,2335)	2.9 (1.2,6.5)	25.7 (-1.6,58)
Greece	155 (60,353)	3 (1.2,6.9)	159 (63,364)	3.6 (1.4,8.3)	19.5 (3.1,38.2)
Iceland	4 (2,9)	3.1 (1.3,7)	6 (3,14)	3.8 (1.5,8.7)	21.3 (6.9,38.4)
Ireland	51 (20,117)	2.9 (1.1,6.7)	83 (32,189)	3.5 (1.4,8)	20.4 (5.1,39.5)
Israel	60 (23,135)	2.4 (0.9,5.5)	138 (54,313)	3.1 (1.2,7)	27.3 (7.7,46.9)
Italy	1769 (733,4043)	6.1 (2.5,13.9)	1656 (679,3820)	6.9 (2.8,16)	13.7 (-2.2,36.1)
Luxembourg	6 (2,14)	3 (1.2,6.7)	12 (5,27)	3.6 (1.4,8.2)	23.4 (8.7,39.8)
Malta	6 (2,13)	2.8 (1.1,6.4)	7 (3,17)	3.7 (1.4,8.5)	30 (11.3,48.8)
Monaco	0 (0,1)	3.2 (1.3,7.2)	1 (0,1)	3.7 (1.4,8.1)	15.2 (1.3,30.3)
Netherlands	219 (87,496)	2.7 (1.1,6)	245 (94,553)	3.3 (1.3,7.5)	23.2 (7.3,42)
Norway	64 (25,144)	3 (1.2,6.7)	83 (33,191)	3.4 (1.3,7.8)	13.8 (7.4,20.7)
Portugal	132 (51,294)	2.6 (1,5.8)	158 (63,356)	3.4 (1.4,7.5)	29.7 (11.9,50)
San Marino	0 (0,1)	3.1 (1.3,7)	1 (0,1)	3.6 (1.4,8.3)	16.1 (-0.6,33.2)
Spain	439 (183,949)	2.3 (0.9,4.9)	603 (237,1337)	3 (1.2,6.6)	31.8 (3,63.4)
Sweden	100 (38,236)	2.4 (0.9,5.7)	126 (48,294)	2.8 (1.1,6.6)	18 (4.7,33.2)
Switzerland	107 (42,237)	2.9 (1.1,6.5)	131 (51,298)	3.2 (1.3,7.3)	11.3 (-1.8,29)
United Kingdom	950 (378,2143)	3.2 (1.3,7.3)	1218 (476,2778)	3.9 (1.5,8.9)	20.1 (9.8,26)
Western Sub-Saharan Africa	497 (192,1123)	0.5 (0.2,1.2)	1954 (753,4460)	0.8 (0.3,1.8)	44.2 (34.4,56.3)
Benin	11 (4,25)	0.5 (0.2,1.1)	59 (22,135)	0.9 (0.3,2)	80.6 (46.9,134.5)
Burkina Faso	21 (8,50)	0.5 (0.2,1.1)	85 (32,196)	0.7 (0.3,1.7)	55.5 (18,104.8)
Cabo Verde	1 (0,2)	0.5 (0.2,1.2)	3 (1,6)	0.9 (0.3,2.1)	66.3 (37.5,107.9)
Cameroon	39 (15,90)	0.8 (0.3,1.8)	173 (64,384)	1.1 (0.4,2.3)	36.8 (11.7,69.3)
Chad	10 (4,23)	0.4 (0.1,0.8)	44 (16,101)	0.6 (0.2,1.2)	53.3 (22.9,94)
Gambia	2 (1,5)	0.5 (0.2,1.1)	10 (4,22)	0.8 (0.3,1.7)	49.8 (19,86.2)
Ghana	38 (15,90)	0.5 (0.2,1.2)	149 (53,335)	0.8 (0.3,1.8)	51 (23,87.5)
Guinea	13 (5,29)	0.5 (0.2,1)	48 (17,114)	0.7 (0.3,1.6)	51.2 (20,91.5)
Guinea-Bissau	2 (1,5)	0.5 (0.2,1)	8 (3,18)	0.7 (0.3,1.6)	54.5 (24.1,95.7)
Liberia	6 (2,14)	0.5 (0.2,1.2)	22 (8,51)	0.8 (0.3,1.8)	44.2 (16.2,80.5)
Mali	16 (6,36)	0.4 (0.1,0.9)	72 (27,172)	0.6 (0.2,1.5)	56.1 (25.5,96.6)
Mauritania	6 (2,15)	0.7 (0.2,1.5)	21 (8,49)	0.9 (0.4,2.2)	44.5 (16.2,80.6)
Niger	16 (6,35)	0.4 (0.2,1)	63 (24,149)	0.6 (0.2,1.3)	31.4 (5,63.1)
Nigeria	246 (94,550)	0.6 (0.2,1.3)	947 (365,2166)	0.8 (0.3,1.8)	37.4 (26.1,51.3)
Sao Tome and Principe	0 (0,1)	0.5 (0.2,1.3)	1 (0,2)	0.8 (0.3,1.8)	47.3 (20.9,80.6)
Senegal	22 (8,52)	0.6 (0.2,1.4)	62 (23,146)	0.8 (0.3,1.8)	23.9 (1.7,49.3)
Sierra Leone	10 (4,22)	0.5 (0.2,1)	37 (13,86)	0.8 (0.3,1.8)	71 (35.9,110.9)
Togo	8 (3,19)	0.5 (0.2,1.1)	33 (12,73)	0.7 (0.3,1.6)	56.8 (25.6,97.5)
Côte d'Ivoire	29 (11,65)	0.5 (0.2,1.1)	117 (42,274)	0.8 (0.3,2)	68.4 (38,113.5)
